# Supplementary material for: Mitochondrial and Nuclear Genomic Responses to Loss of LRPPRC Expression
Source: PubMed Central journal article supplement — J Biol Chem. 2010 Mar 10;285(18):13742–7. doi: 10.1074/jbc.M109.098400 (PMC2859537; doi:10.1074/jbc.m109.098400), 2010-03-10
Supplement: supp_M109.098400_jbc.M109.098400-1.pdf [file supp_M109.098400_jbc.M109.098400-1.pdf]

**Supplementary Table 1. shRNA sequences used for *LRPPRC* knockdown.**

| <i>LRPPRC</i> kd | Clone Name           | Sequence (5' → 3')    |
|------------------|----------------------|-----------------------|
| kd1              | NM_133259.2-1441s1c1 | CCTCAAAGGAATGCAAGAATT |
| kd2              | NM_133259.2-2443s1c1 | CGCAGCTTTAAGAGGTGAAAT |
| kd3              | NM_133259.2-3384s1c1 | GCCTCATCATAACGCAAGTTA |
| kd4              | NM_133259.2-4626s1c1 | CCGTGAACTTTCTAACGCATA |
| kd5              | NM_133259.2-868s1c1  | CCTCGCATTATTGAATGCATA |
| kd6              | NM_133259.x-163s1c1  | ATGTGAGTCACTATAATGCT  |
| kd7              | NM_133259.x-4007s1c1 | ACCATAACTCTGTGCACTTG  |

**Supplementary Table 2. Probe and primer sequences of mitochondrial mRNA, rRNA, and polycistronic RNA (pre-RNA) for qRT-PCR Taqman assay.**

| Gene ID | Probe             | Forward Primer             | Reverse Primer             |
|---------|-------------------|----------------------------|----------------------------|
| MT-ND1  | CACCGCCCCGACCTT   | CCCTAAAACCCGCCACATCT       | GGCTAGAATAAATAGGAGGCCTAGGT |
| MT-ND2  | TTGCAGGCACACTCATC | AACCCGTCATCTACTCTACCATCT   | GCTTCTGTGGAACGAGGGTTTATTT  |
| MT-ND3  | TCGAAGCCGCACTCGT  | CCACAACCAACGGCTACATAGAAA   | GGGTAAAAGGAGGGCAATTTCTAGA  |
| MT-ND4  | CTCCTGAGCCAACAAC  | TCACAACACCCTAGGCTCACTAA    | GGGAGTCATAAGTGGAGTCCGT     |
| MT-ND4L | CTCAACACCCACTCCC  | TCCTCCCTACTATGCCTAGAAGGA   | CTTCGCAGGCCGGCAAA          |
| MT-ND5  | TCGCTGTCACTTTCC   | CGGAAGCCTATTTCGCAGGATT     | GTAGTTGAGGTCTAGGGCTGTTAGA  |
| MT-ND6  | CCACCACCCCATCATAC | GGTTAGCGATGGAGGTAGGATTG    | AAAGCCCCCGCACCAATA         |
| MT-CYB  | CCCTCGGCTTACTTCT  | TCACCTCCCATTCCGATAAAATCAC  | GGGTTGGCTAGGGTATAATTGTCTG  |
| MT-CO1  | TAGCTGCTGGCATCACT | CAGCAGTCCTACTTCTCCTATCTCT  | GGGTCTGAAGAAGGTGGTGTT      |
| MT-CO2  | CCCGCCATCATCCTAG  | GCCCTTTTCCTAACACTCACAACAA  | GTAAAGGATGCGTAGGGATGGG     |
| MT-CO3  | ACCCTCCTACAAGCCTC | TCACCTGAGCTCACCATAGTCTAAT  | GCCGTCGGAAATGGTGAAG        |
| MT-ATP6 | ACTGCAGGCCACCTAC  | CGTACGCCTAACCGCTAACATT     | GCGACAGCGATTTCTAGGATAGT    |
| MT-ATP8 | CCCACCATAATTACCC  | GCCCCAACTAAATACTACCGTATGG  | GGCTTTGGTGAGGGAGGTA        |
| MT-12S  | ATCACTGCTGTTTCCC  | ATGCAGCTCAAACGCTTAGC       | GCTGGCACGAAATTGACCAA       |
| MT-16S  | CAAAGCGCCTTCCCC   | CCCTGTACGAAAGGACAAGAGAAAT  | TCTTGGGTGGGTGTGGGTATAAT    |
| Pre-RNA | ACGGGAAGGGTATAACC | CCTGCAAAGATGGTAGAGTAGATGAC | GGGCCCATACCCCGAAAAT        |

**Supplementary Table 3. A list of previous studies on mitochondrial genes showing biochemical defects in human primary skin fibroblasts.**

| Gene   | Reference                   |
|--------|-----------------------------|
| TAZ    | Vreken, P. et al. 2000      |
| BCS1L  | de Lonlay, P. et al. 2001   |
| COX15  | Antonicka, H. et al. 2003   |
| TK2    | Vila, M. R. et al. 2003     |
| DGUOK  | Taanman, J. W. et al. 2003  |
| COX10  | Antonicka, H. et al. 2003   |
| SCO1   | Williams, S. L. et al. 2004 |
| SURF1  | Williams, S. L. et al. 2004 |
| ETHE1  | Tiranti, V. et al. 2004     |
| ATPAF2 | De Meirleir, L. et al. 2004 |
| LRPPRC | Xu, F. et al. 2004          |
| SCO2   | Leary, S. C. et al. 2004    |
| FXN    | Sturm, B. et al. 2005       |
| SDHA   | Briere, J. J. et al. 2005   |

Vreken, P. , Valianpour, F. , Nijtmans, L. G. , Grivell, L. A. , Plecko, B. , Wanders, R. J. , and Barth, P. G. (2000) *Biochem Biophys Res Commun* **279**(2), 378-382

de Lonlay, P. , Valnot, I. , Barrientos, A. , Gorbatyuk, M. , Tzagoloff, A. , Taanman, J. W. , Benayoun, E. , Chretien, D. , Kadhom, N. , Lombes, A. , de Baulny, H. O. , Niaudet, P. , Munnich, A. , Rustin, P. , and Rotig, A. (2001) *Nat Genet* **29**(1), 57-60

Antonicka, H. , Mattman, A. , Carlson, C. G. , Glerum, D. M. , Hoffbuhr, K. C. , Leary, S. C. , Kennaway, N. G. , and Shoubridge, E. A. (2003) *Am J Hum Genet* **72**(1), 101-114

Vila, M. R. , Segovia-Silvestre, T. , Gamez, J. , Marina, A. , Naini, A. B. , Meseguer, A. , Lombes, A. , Bonilla, E. , DiMauro, S. , Hirano, M. , and Andreu, A. L. (2003) *Neurology* **60**(7), 1203-1205

Taanman, J. W. , Muddle, J. R. , and Muntau, A. C. (2003) *Hum Mol Genet* **12**(15), 1839-1845

Antonicka, H. , Leary, S. C. , Guercin, G. H. , Agar, J. N. , Horvath, R. , Kennaway, N. G. , Harding, C. O. , Jaksch, M. , and Shoubridge, E. A. (2003) *Hum Mol Genet.* **12**(20), 2693-2702

Williams, S. L. , Valnot, I. , Rustin, P. , and Taanman, J. W. (2004) *J Biol Chem* **279**(9), 7462-7469

Tiranti, V. , D'Adamo, P. , Briem, E. , Ferrari, G. , Mineri, R. , Lamantea, E. , Mandel, H. , Balestri, P. , Garcia-Silva, M. T. , Vollmer, B. , Rinaldo, P. , Hahn, S. H. , Leonard, J. , Rahman, S. , Dionisi-Vici, C. , Garavaglia, B. , Gasparini, P. , and Zeviani, M. (2004) *Am J Hum Genet* **74**(2), 239-252

De Meirleir, L. , Seneca, S. , Lissens, W. , De Clercq, I. , Eyskens, F. , Gerlo, E. , Smet, J. , and Van Coster, R. (2004) *J Med Genet* **41**(2), 120-124

Xu, F. , Morin, C. , Mitchell, G. , Ackerley, C. , and Robinson, B. H. (2004) *Biochem J* **382**(1), 331-336

Leary, S. C. , Kaufman, B. A. , Pellecchia, G. , Guercin, G. H. , Mattman, A. , Jaksch, M. , and Shoubridge, E. A. (2004) *Hum Mol Genet* **13**(17), 1839-1848

Sturm, B. , Bistrich, U. , Schranzhofer, M. , Sarsero, J. P. , Rauen, U. , Scheiber-Mojdehkar, B. , de Groot, H. , Ioannou, P. , and Petrat, F. (2005) *J Biol Chem* **280**(8), 6701-6708

Briere, J. J. , Favier, J. , Benit, P. , El Ghouzzi, V. , Lorenzato, A. , Rabier, D. , Di Renzo, M. F. , Gimenez-Roqueplo, A. P. , and Rustin, P. (2005) *Hum Mol Genet* **14**(21), 3263-3269

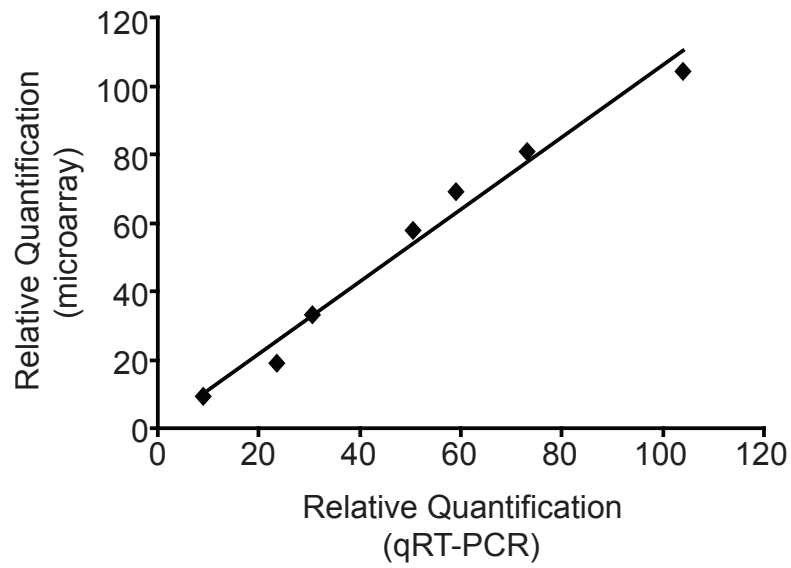

**Supplementary Figure 1. *LRPPRC* transcript levels measured by qRT-PCR and microarray show strong correlation.**

Total cellular RNA was extracted from *LRPPRC* knockdown cell lines. *LRPPRC* transcript level was measured for the same samples by qRT-PCR and microarray. The average of two biological replicates is shown.

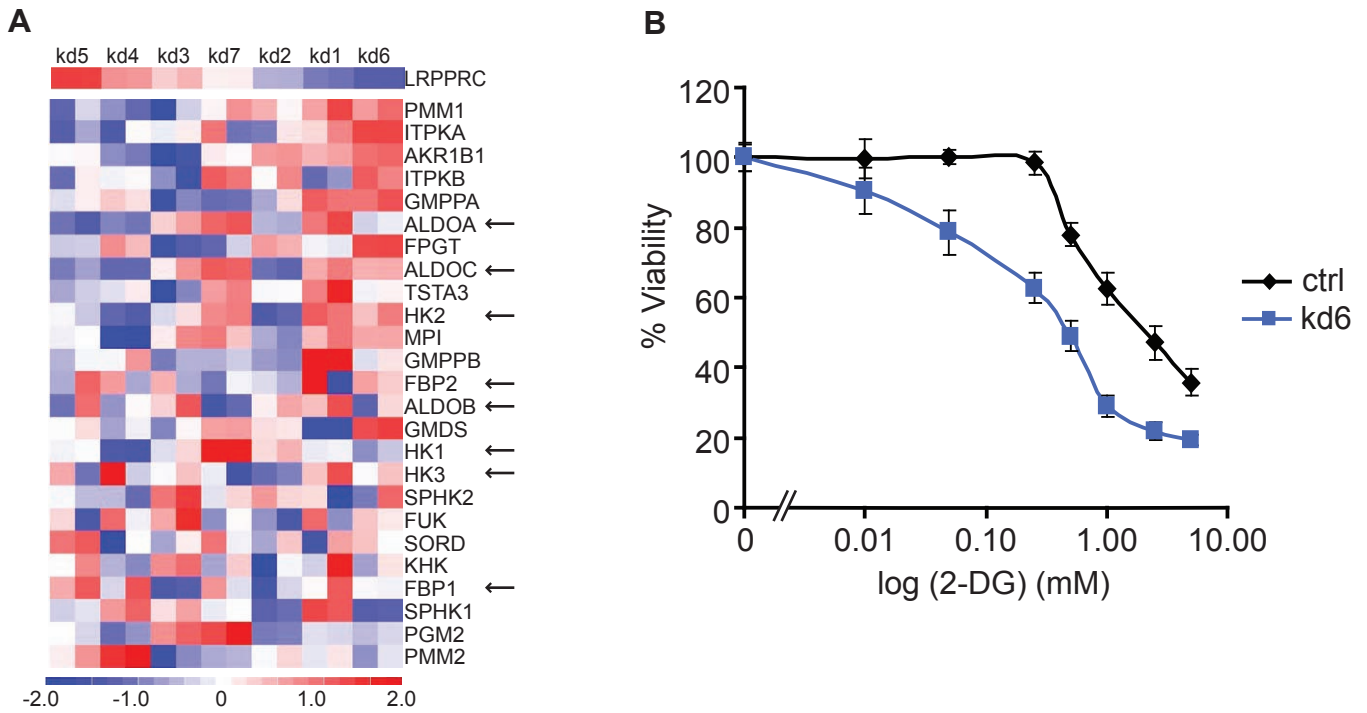

**Supplementary Figure 2. Up-regulation of key glycolytic genes included in the “fructose and mannose metabolism” gene set could be an adaptive nuclear response.**

(A) The expression of genes included in “fructose and mannose metabolism” gene set in *LRPPRC* knockdown cells. Glycolytic genes included in this pathway are indicated by arrows. Two replicates for each knockdown are shown adjacent to each other. (B) MCH58 cells infected with pLKO.1 (ctrl) or shLRPPRC6 (kd6) were grown in the presence of increasing concentrations of the glycolytic inhibitor, 2-deoxyglucose for 72 hours. Cell viability was measured by calcein assay. Data is normalized to untreated cells. (n=5; error bars represent standard deviation from the mean value).

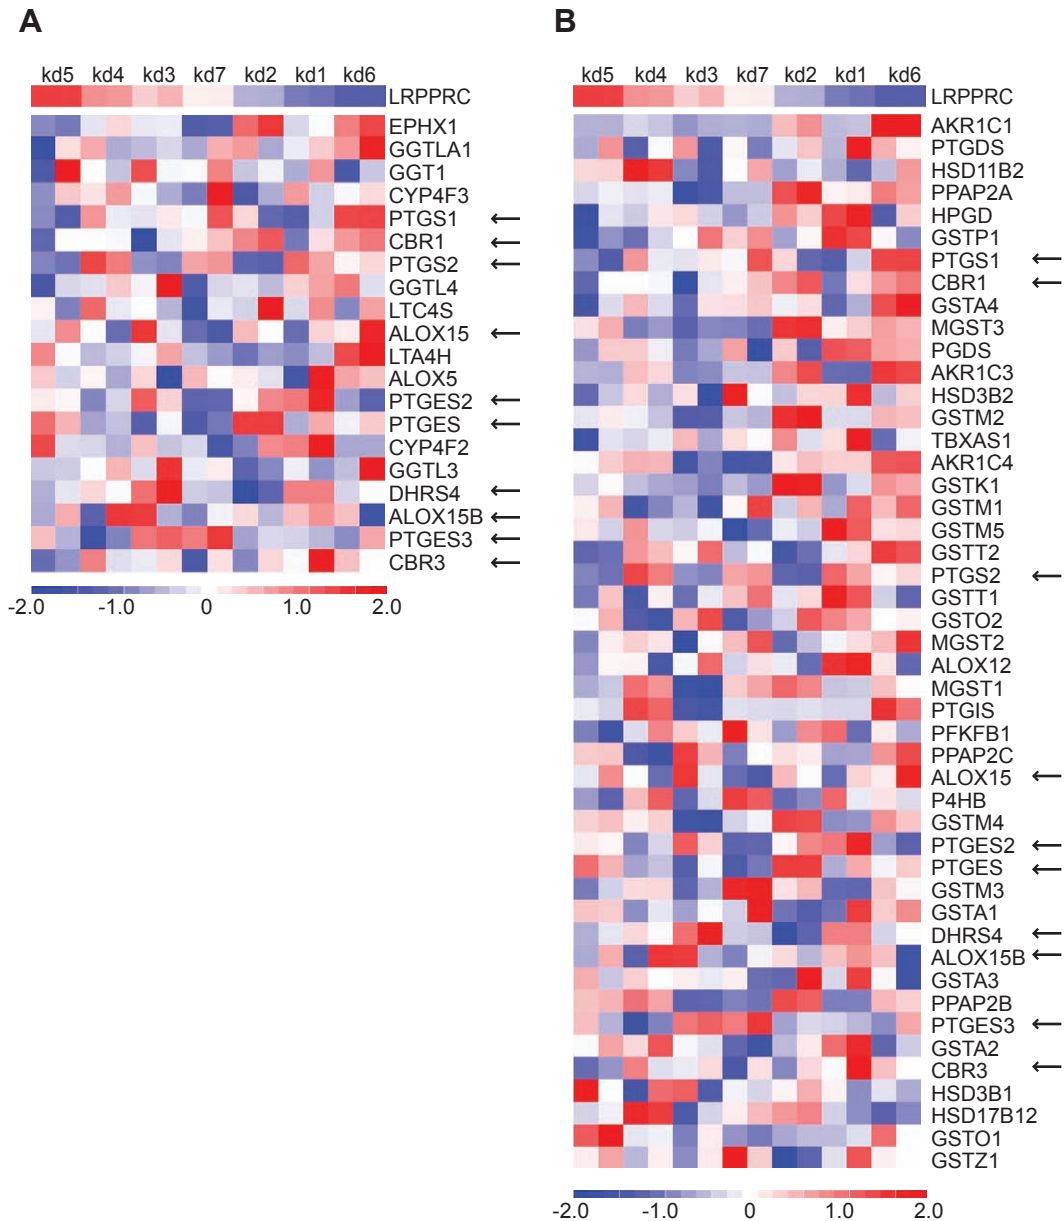

**Supplementary Figure 3. Gene expression profile of gene sets that are anti-correlated to *LRPPRC* expression**

(A) Expression of genes included in the “putative anti-inflammatory metabolite formation from eicosapentanoic acid” gene set in *LRPPRC* knockdown cells. (B) Expression of genes included in the “prostaglandin formation from arachidonate” gene set in *LRPPRC* knockdown cells.

Genes were ordered by their correlation to *LRPPRC* expression profile (shown separately on top), with genes showing strongest anti-correlation at top and weakest anti-correlation at the bottom. Two replicates for each knockdown are shown adjacent to each other. Arrows indicate overlapping genes included in both gene sets.

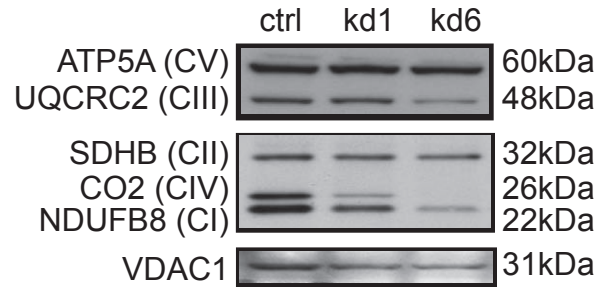

**Supplementary Figure 4. *LRPPRC* knockdown results in a depletion of multiple mitochondrial respiratory chain complexes.**

Western blot assay of whole cell lysate harvested from MCH58 fibroblasts infected either with an empty vector or one of the two most potent shRNAs against *LRPPRC*. Blotted proteins are indicated to the left of the image with the respective mitochondrial respiratory chain complex in parentheses. VDAC1 was used as a loading control.
